# Supplementary material for: An unprecedented 1,4-diphospha-2,3-disila butadiene (–PSi–SiP–) derivative and a 1,3-diphospha-2-silaallyl anion, each stabilized by the amidinate ligand
Source: Royal Society of Chemistry journal article supplement (doi:10.1039/c6cc09171g), 2016-11-24
Supplement: c6cc09171g1.pdf [file c6cc09171g1.pdf]

## ESI

### **An unprecedented 1,4-diphospha-2,3-disila butadiene (-P=Si-Si=P-) derivative and a 1,3-diphospha-2-silaallyl anion each stabilized by the amidinate ligand**

**Subrata Kundu, Chandrajeet Mohapatra, Prinson P. Samuel, Johannes Kretsch, M. G. Walawalkar, Regine Herbst-Irmer, Dietmar Stalke\*, Sriman De, Debasis Koley\*, Herbert W. Roesky\***

### Content:

- (S1) Syntheses of compounds **2** and **3**
- (S2) Theoretical calculations
- (S3) Crystal data of **2** and **3**
- (S4) NMR spectra
- (S5) References

### (S1) Synthesis

#### Experimental Section

All reactions and handling of reagents were performed under an atmosphere of dry nitrogen or argon using standard Schlenk techniques or a glove box where the O<sub>2</sub> and H<sub>2</sub>O levels were kept below 1 ppm. Heteroleptic chlorosilylene LSiCl (**1**)<sup>15</sup> and TripPCl<sub>2</sub><sup>16</sup> were prepared according to literature methods. Solvents were purified with the M-Braun solvent drying system. Solution NMR spectra were recorded on Bruker Avance 200, Bruker Avance 300, and Bruker Avance 500 MHz NMR spectrometers. Deuterated NMR solvent THF-d<sup>8</sup> and C<sub>6</sub>D<sub>6</sub> were dried by stirring for 2 days over Na/K alloy followed by distillation in vacuum. EI-MS spectra were obtained with a Finnigan MAT 8230 or a Varian MAT CH5 instrument (70 eV) by EI-MS methods. Elemental analyses were performed by the Analytisches Labor des Instituts für Anorganische Chemie der Universität Göttingen. Melting points were measured in sealed glass tubes on a Büchi B-540 melting point apparatus.

**[(TripP=Si-L)<sub>2</sub>] (2):** The mixture of LSiCl (1) (0.20g; 0.67 mmol), TripPCl<sub>2</sub> (0.21g; 0.67 mmol) and KC<sub>8</sub> (0.28g; 2.03 mmol) was taken into a 100 mL Schlenk flask and 40 mL of THF was added at -78 °C. Stirring was continued till the solution came to room temperature and stirring proceeded for one additional hour. THF was removed under reduced pressure and n-hexane (50 mL) was added to the residue to extract **2**. The solution was then filtered over a G4 frit. The volume of n-hexane was reduced to 20 mL and the solution was cooled to -35 °C while 0.21 g (58%) of dark yellow colored crystals were formed which were suitable for X-ray diffraction.

<sup>1</sup>H NMR (500 MHz, 298 K, C<sub>6</sub>D<sub>6</sub>, ppm) δ: 7.38 (2H, Ar), 7.20-7.26 (6H, Ar), 6.85-7.05 (6H, Ar), 4.69 (m, 4H), 2.96 (m, 2H), 1.56 (d, 24H), 1.38 (d, 12H), 1.35 (s, 36H). <sup>13</sup>C NMR (126 MHz, 298 K, C<sub>6</sub>D<sub>6</sub>, ppm) δ 152.8, 145.2, 132.2, 131.6, 130.2, 127.8, 127.58, 127.54, 127.05, 120.1, 55.3, 34.7, 33.96, 31.9, 24.57. <sup>31</sup>P NMR (202 MHz, 298 K, C<sub>6</sub>D<sub>6</sub>) δ -133; <sup>29</sup>Si NMR (99 MHz, 298 K, C<sub>6</sub>D<sub>6</sub>, ppm) δ 23.3 ppm (dd, <sup>1</sup>J<sub>Sip</sub> = 231 Hz, <sup>2</sup>J<sub>Sip</sub> = 44 Hz). Elemental analysis for C<sub>63.50</sub> H<sub>96</sub> N<sub>4</sub> P<sub>2</sub> Si<sub>2</sub>: Calc. C, 73.79%; H, 9.36%; N, 5.42%. Found C 73.91%, H 9.29%, N 5.37%. MP. 210 °C (decomp.).

**[{(TripP)<sub>2</sub>SiL}·{K(18 crown 6)·THF}]<sup>+</sup> (3):** The mixture of LSiCl (1) (0.20g, 0.67 mmol), TripPCl<sub>2</sub> (0.42g, 1.36 mmol), 18-crown-6 ether (0.18g; 0.67 mmol) and KC<sub>8</sub> (551 mg; 4.08 mmol) was placed in a 100 mL Schlenk flask and 40 mL of THF were added at -78 °C. Stirring was continued till the solution came to room temperature and stirring was continued for one hour at room temperature. THF was removed under reduced pressure and toluene (50 mL) was added to the residue to extract **3**. The solution was then filtered over a G4 frit. The volume of toluene was reduced to 15 mL and 1 mL of THF was added to the toluene solution. The latter was cooled to -35 °C. Finally 0.34 g (45%) of dark yellow colored crystals were formed which were suitable for X-ray diffraction.

$^1\text{H}$  NMR (500 MHz, 298 K, THF- $d^8$ , ppm)  $\delta$  6.69-7.54 (m, 9H, Ar), 4.87 (m, 4H), 3.62 (s, 24H, crown ether), 3.60 (m, 8H, coordinated THF), 2.70 (m, 2H), 1.77 (m, 8H, coordinated THF), 1.24 (d, 24H); 1.17 (d, 12H); 0.94 (s, 18H).  $^{13}\text{C}$  NMR (126 MHz, 298 K, THF- $d^8$ , ppm),  $\delta$  167.8, 154.8, 142.2, 135.3, 130.3, 127.8, 118.7, 71.3, 54.1, 35.4, 33.6, 29.3, 26.3, 25.7, 25.6, 23.9.  $^{31}\text{P}$  NMR (202 MHz, 298 K,  $\text{C}_6\text{D}_6$ )  $\delta$  -161.5 ppm;  $^{29}\text{Si}$  NMR (99 MHz, 298 K, THF- $d^8$ , ppm),  $\delta$  43.35 ppm (t,  $^1J_{\text{SiP}} = 181$  Hz). Elemental analysis for  $\text{C}_{61}\text{H}_{101}\text{KN}_2\text{O}_7\text{P}_2\text{Si}$ : Calc. C, 66.39%; H, 9.22%; N, 2.54%; Found C 66.45%, H 9.25%, N 2.50%. M.P.: 138 °C.

## (S2) Theoretical Calculations

**Computational Details:** All computational calculations are performed by density functional theory (DFT) methods using Gaussian 09<sup>1</sup> (G09) and ADF2013.01<sup>2</sup> program packages. Geometries of all the complexes are optimized with the global-hybrid meta-GGA to the DFT functional, R/U-M062X<sup>3</sup> with SVP<sup>4</sup> basis sets for all atoms without symmetry constraints. Single point solvent calculations are performed at R/U-M06-2X/def2-TZVP//M06-2X/def2-SVP using the SMD continuum solvation model<sup>5</sup> implemented in Gaussian 09. All energy values reported in the manuscript are at R/U-M06-2X/def2-TZVP/SMD//R/U-M06-2X/def2-SVP level of theory. Within ADF2013.01, Natural bond orbital (NBO) analysis is performed by using the NBO 6.0<sup>6</sup> program at the BP86<sup>7</sup> level in combination with a triple- $\zeta$ -quality basis set using uncontracted slater-type orbital (STO)<sup>8</sup> augmented with two set of polarization functions for all atoms without any frozen core approximation. Scalar relativistic effects are treated with zeroth-order regular (ZORA) approximation<sup>9</sup>. QTAIM<sup>10</sup> analysis in the AIMALL program is also performed in the wave function generated file at R/U-M06-2X/def2-TZVP//R/U-M06-2X/def2-SVP level of theory. Any bonded pair of atoms has a bond path, *i.e.* a connecting line with maximum electron density. The bond critical point (BCP) is a point on this line where the gradient  $\nabla\rho(\mathbf{r})$  of the density is equal to zero. The magnitude of the electron density,  $\rho(\mathbf{r})$  and its Laplacian,  $\nabla^2\rho(\mathbf{r})$  at the BCP provide information about the strength and type of bond. The Laplacian indicates whether the density is locally concentrated ( $\nabla^2\rho < 0$ ) or depleted ( $\nabla^2\rho > 0$ ). Ellipticities at BCP represent the deviations of the bonding density from cylindrical symmetry. It is quantitatively expressed as  $\epsilon_{\text{BCP}} = \lambda_2/\lambda_1 - 1$ , where

$\lambda_1$  and  $\lambda_2$  are eigen values of the Hessian of  $\rho(r)$  at BCP. NMR parameters are calculated using zeroth-order regular approximation (ZORA) in the PBE0<sup>11</sup> functional with double polarized valance triple-zeta basis set TZ2P. The resulting chemical shifts are carried out using the formula  $\delta = \sigma_{\text{ref}} - \sigma$  for <sup>29</sup>Si and  $\delta = \sigma_{\text{ref}} - \sigma - 266.1$ <sup>12</sup> for <sup>31</sup>P, where  $\sigma_{\text{ref}}$  = nuclear shielding constant of reference compound and  $\sigma$  = nuclear shielding constant of **2** and **3**. For <sup>29</sup>Si, TMS was taken as standard, whereas for <sup>31</sup>P, PH<sub>3</sub> was used. For NBO analysis of **3**, we have truncated K(18-crown-6)ether cation from the optimized geometry. Figures are generated using the CYLview<sup>13</sup> and ADF-GUI visualization program. Figures in the main text are made from Chemcraft<sup>14</sup> visualization program.

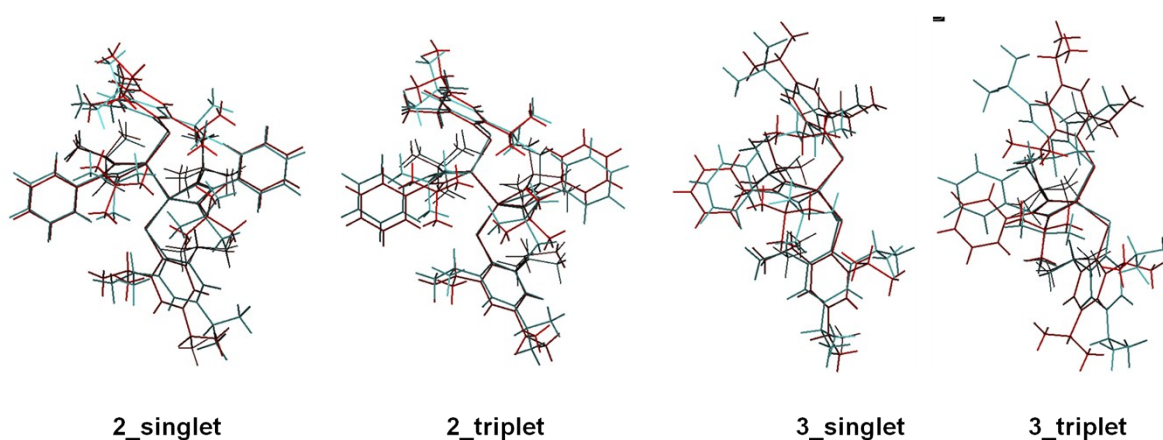

**Figure S1.** Superposition of crystal structure of **2** and **3** with optimized geometries of different spin states at R/U-M06-2X/def2-SVP level.

**Table S1.** Calculated geometrical parameters [distances (d) are in Å and angles (A) are in degree (°)] of compound **2** and **3** (in singlet and triplet electronic states).

| <b>2</b>   | Crystal Structure | R/U-M06-2X/def2-SVP |         |
|------------|-------------------|---------------------|---------|
|            |                   | Singlet             | Triplet |
| d(Si1-Si2) | 2.382             | 2.375               | 2.368   |
| d(Si1-P1)  | 2.120             | 2.133               | 2.294   |
| d(Si2-P2)  | 2.126             | 2.125               | 2.143   |
| d(P1-C1)   | 1.859             | 1.868               | 1.854   |
| d(P2-C2)   | 1.838             | 1.877               | 1.873   |

|               |       |       |       |
|---------------|-------|-------|-------|
| d(Si1-N1)     | 1.834 | 1.861 | 1.986 |
| d(Si1-N2)     | 1.877 | 1.890 | 1.889 |
| d(Si2-N3)     | 1.837 | 1.856 | 1.874 |
| d(Si2-N4)     | 1.879 | 1.903 | 1.923 |
| A(P1-Si1-Si2) | 110.8 | 114.4 | 111.9 |
| A(P2-Si2-Si1) | 111.3 | 114.4 | 109.3 |
| A(Si1-P1-C1)  | 107.6 | 101.5 | 98.2  |
| A(Si2-P2-C2)  | 111.0 | 102.5 | 103.0 |
| A(N1-Si1-P1)  | 123.3 | 123.9 | 115.9 |
| A(N2-Si1-P1)  | 129.7 | 127.8 | 107.7 |
| A(N3-Si2-P2)  | 124.3 | 124.3 | 123.2 |
| A(N4-Si2-P2)  | 129.8 | 129.4 | 126.8 |

| 3            | Crystal Structure | R/U-M06-2X/def2-SVP |         |
|--------------|-------------------|---------------------|---------|
|              |                   | Singlet             | Triplet |
| d(Si1-P1)    | 2.166             | 2.146               | 2.288   |
| d(Si1-P2)    | 2.168             | 2.166               | 2.169   |
| d(P1-C1)     | 1.873             | 1.880               | 1.861   |
| d(P2-C2)     | 1.875             | 1.872               | 1.867   |
| d(Si1-N1)    | 1.887             | 1.906               | 1.791   |
| d(Si1-N2)    | 1.883             | 1.925               | 1.784   |
| A(P1-Si1-P2) | 103.1             | 108.5               | 92.2    |
| A(C1-P1-Si1) | 106.9             | 104.1               | 106.4   |
| A(C2-P2-Si1) | 120.0             | 107.1               | 109.4   |
| A(N1-Si1-P1) | 115.6             | 115.3               | 118.1   |
| A(N1-Si1-P2) | 125.6             | 121.9               | 128.3   |
| A(N2-Si1-P1) | 122.8             | 123.7               | 122.8   |
| A(N2-Si1-P2) | 119.2             | 115.5               | 124.2   |

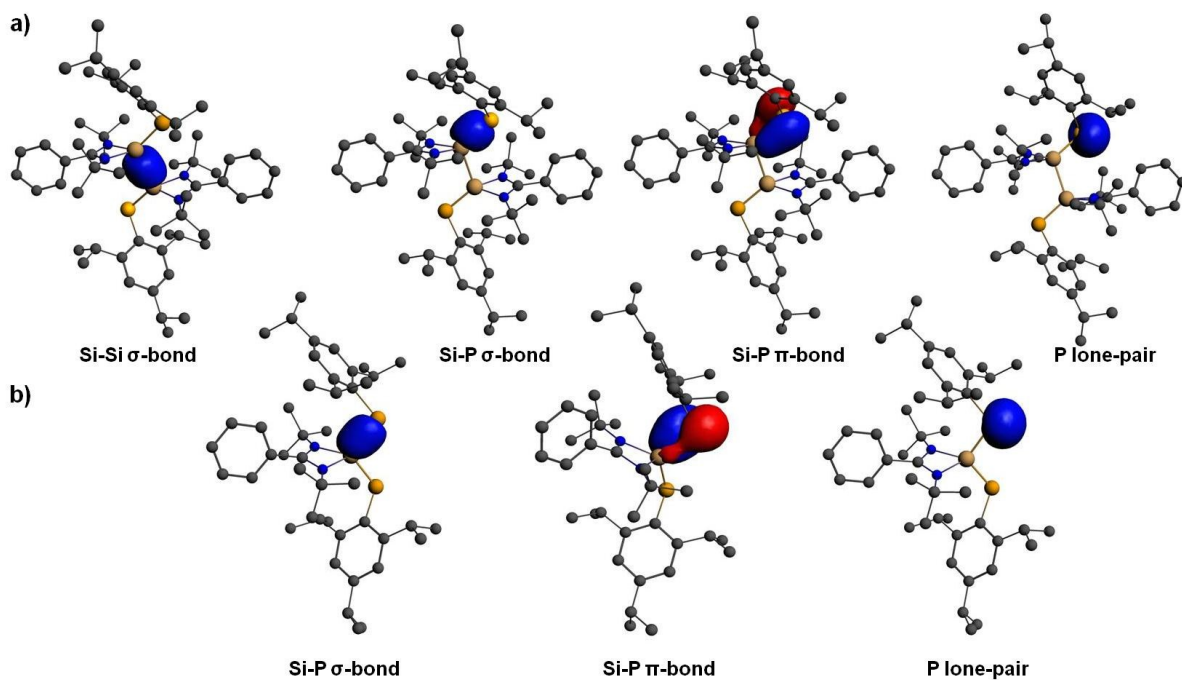

**Figure S2.** Selected NBOs of a) complex **2** and b) complex **3** (isosurface = 0.06 a.u.). H atoms are omitted for clarity.

**Table S2.** NBO results of **2** and **3** at BP86/TZ2P level of theory.

|          | Bond  | Occupancy | Polarization        | WBI  |
|----------|-------|-----------|---------------------|------|
| <b>2</b> | Si-Si | 1.878     | Si(49.6%)–Si(50.4%) | 0.85 |
|          | Si-P  | 1.940     | Si(42.6%)–P(57.4%)  | 1.40 |
|          | Si-P  | 1.847     | Si(20.2%)–P(79.8%)  |      |
|          | LP P  | 1.886     | (63.6% s; 36.4% p)  |      |

|          | Bond | Occupancy | Polarization       | WBI  |
|----------|------|-----------|--------------------|------|
| <b>3</b> | Si-P | 1.891     | Si(40.9%)–P(59.1%) | 1.30 |
|          | Si-P | 1.828     | Si(18.6%)–P(81.4%) |      |
|          | LP P | 1.885     | (66.1% s; 33.8% p) |      |

**Table S3.** Partial charges(q) of **2** and **3**.

|          | Fragments | Partial Charges(q) |          | Fragments | Partial Charges(q) |
|----------|-----------|--------------------|----------|-----------|--------------------|
| <b>2</b> | LSi       | 0.76               | <b>3</b> | LSi       | 0.77               |
|          | TripP     | -0.76              |          | TripP     | -0.88              |

**Table S4.** BCP parameters of **2** and **3**

| Entry    | Bond  | $\rho(e/\text{\AA}^3)$ | $\nabla^2\rho(e/\text{\AA}^5)$ | $\epsilon_{\text{BCP}}$ |
|----------|-------|------------------------|--------------------------------|-------------------------|
| <b>2</b> | Si–Si | 0.092                  | -0.155                         | 0.075                   |
|          | Si–P  | 0.111                  | -0.059                         | 0.335                   |
|          | Si–P  | 0.111                  | -0.044                         | 0.351                   |

| Entry    | Bond | $\rho(e/\text{\AA}^3)$ | $\nabla^2\rho(e/\text{\AA}^5)$ | $\epsilon_{\text{BCP}}$ |
|----------|------|------------------------|--------------------------------|-------------------------|
| <b>3</b> | Si–P | 0.108                  | -0.044                         | 0.334                   |
|          | Si–P | 0.106                  | -0.059                         | 0.268                   |

**Table S5.** Calculated chemical shifts values (in ppm) of selected atoms for **2** and **3** at PBE0/TZ2P level of theory.

|          |      |        |        |        |
|----------|------|--------|--------|--------|
| <b>2</b> | Si1  | Si2    | P1     | P2     |
|          | 30.0 | 38.9   | -141.5 | -156.6 |
| <b>3</b> | Si1  | P1     | P2     |        |
|          | 42.4 | -177.8 | -141.1 |        |

**Table S6:** Formal Charges

|          |      |                  |          |       |                  |
|----------|------|------------------|----------|-------|------------------|
| <b>2</b> | Atom | Formal Charge(q) | <b>3</b> | Atom  | Formal Charge(q) |
|          | Si   | 1.08             |          | Si    | 1.06             |
|          | N1   | -0.70            |          | N1    | -0.67            |
|          | N2   | -0.71            |          | N2    | -0.66            |
|          | P    | -0.37            |          | P1    | -0.38            |
|          |      |                  | P2       | -0.39 |                  |

**Table S7:** Natural Bond Order (total/covalent/ionic):

| Entry    | NBO    | Total  | Covalent     | Ionic        |
|----------|--------|--------|--------------|--------------|
| <b>2</b> | Si1–N1 | 0.6873 | 0.1388 (20%) | 0.5485 (80%) |
|          | Si1–N2 | 0.5551 | 0.1780 (32%) | 0.3770 (68%) |
| <b>3</b> | Si1–N1 | 0.8466 | 0.3193 (38%) | 0.5273 (62%) |
|          | Si1–N2 | 0.5896 | 0.1020 (18%) | 0.4877 (82%) |

**Table S8:** Natural Atom Valences

| Entry    | Atom | Co-valence |
|----------|------|------------|
| <b>2</b> | Si   | 3.8        |
| <b>3</b> | Si   | 3.7        |

**Table S9:** 3-center, 4-electron (Hyper Bond)

| Entry    | Hyper Bond(A-B-C) | %A-B/%B-C | Occupancy |
|----------|-------------------|-----------|-----------|
| <b>2</b> | N1-C1-N2          | 47.5/52.5 | 3.981     |
| <b>3</b> | N1-C1-N2          | 50.4/49.6 | 3.990     |

**Table S10.** The Cartesian coordinates (in Å) of optimized geometries of **2** and **3** at R/U-M062X/def2-SVP level of theory.

| <b>2_singlet</b> |          |          |          |   |          |          |          |
|------------------|----------|----------|----------|---|----------|----------|----------|
| Si               | -1.22968 | 0.11597  | 0.83364  | H | -2.74555 | 3.27877  | 4.55496  |
| P                | 2.09571  | 1.91690  | 0.70025  | H | -3.62643 | 2.68109  | 3.12515  |
| N                | -1.86492 | 1.41687  | -0.33585 | H | -2.56735 | 4.12032  | 3.00328  |
| N                | -1.53363 | 1.73134  | 1.76612  | C | -0.18232 | 2.92175  | 3.46128  |
| N                | 1.59724  | -1.38999 | -0.40227 | H | -0.08138 | 3.82837  | 2.84715  |
| N                | 1.54360  | -1.52735 | 1.74852  | H | 0.68050  | 2.27639  | 3.24254  |
| C                | -1.82481 | 2.34653  | 0.62838  | H | -0.15251 | 3.21568  | 4.52124  |
| C                | -2.06534 | 1.57469  | -1.78950 | C | -1.63525 | 0.95405  | 4.02988  |
| C                | -0.86847 | 2.30946  | -2.40332 | H | -1.60188 | 1.23023  | 5.09317  |
| H                | -0.84058 | 3.35847  | -2.07422 | H | -0.81309 | 0.25344  | 3.83331  |
| H                | -0.93504 | 2.29652  | -3.50148 | H | -2.57816 | 0.42636  | 3.82017  |
| H                | 0.07011  | 1.83410  | -2.09392 | C | -1.50133 | 2.20572  | 3.15998  |
| C                | -3.36328 | 2.33238  | -2.09411 | C | -2.22186 | 0.16567  | -2.37509 |
| H                | -3.29719 | 3.39736  | -1.83932 | H | -1.50079 | -0.54766 | -1.94649 |
| H                | -4.20432 | 1.86793  | -1.55590 | H | -2.07870 | 0.19817  | -3.46479 |
| H                | -3.56912 | 2.25754  | -3.17225 | H | -3.22775 | -0.22191 | -2.16483 |
| C                | -2.68267 | 3.13284  | 3.46702  | C | -1.97729 | 3.81830  | 0.45608  |
|                  |          |          |          | C | -0.81623 | 4.58260  | 0.30049  |



|   |          |          |          |
|---|----------|----------|----------|
| H | 0.15721  | 4.08042  | 0.28514  |
| C | -0.91846 | 5.96675  | 0.16273  |
| H | -0.01309 | 6.56276  | 0.03927  |
| C | -3.32442 | 5.81642  | 0.34545  |
| H | -4.30291 | 6.29777  | 0.36758  |
| C | -2.16889 | 6.58305  | 0.18558  |
| H | -2.24499 | 7.66634  | 0.08016  |
| C | 1.69526  | -2.23154 | 0.63407  |
| C | -3.23170 | 4.43384  | 0.48033  |
| H | -4.12947 | 3.82797  | 0.61416  |
| C | 1.08023  | -2.80635 | -2.38507 |
| H | 1.44437  | -3.77195 | -2.00968 |
| H | 1.16658  | -2.81738 | -3.48149 |
| H | 0.01577  | -2.70485 | -2.12320 |
| C | 1.88257  | -1.62307 | -1.83188 |
| C | 1.47572  | -0.35699 | -2.58013 |
| H | 0.39258  | -0.20216 | -2.51717 |
| H | 1.74712  | -0.45256 | -3.64114 |
| H | 1.99214  | 0.51973  | -2.16386 |
| C | 3.38746  | -1.83604 | -2.03396 |
| H | 3.95092  | -0.96878 | -1.65751 |
| H | 3.60128  | -1.95247 | -3.10687 |
| H | 3.73618  | -2.74398 | -1.52387 |
| C | 1.56845  | -1.94393 | 3.16412  |
| C | 2.67281  | -2.97552 | 3.42913  |
| H | 3.61571  | -2.66913 | 2.95348  |
| H | 2.40101  | -3.97694 | 3.07245  |
| H | 2.83885  | -3.03972 | 4.51442  |
| C | 0.22025  | -2.52789 | 3.59254  |
| H | 0.27125  | -2.83430 | 4.64823  |

|   |          |          |          |
|---|----------|----------|----------|
| H | -0.03810 | -3.40754 | 2.98624  |
| H | -0.59455 | -1.80127 | 3.47557  |
| C | 1.87989  | -0.68603 | 3.98201  |
| H | 1.74731  | -0.89851 | 5.05226  |
| H | 1.21605  | 0.14595  | 3.71000  |
| H | 2.91337  | -0.34998 | 3.81732  |
| C | 1.83975  | -3.71132 | 0.54635  |
| C | 3.09289  | -4.32160 | 0.45392  |
| H | 3.99766  | -3.71154 | 0.45917  |
| C | 3.18213  | -5.70998 | 0.38015  |
| H | 4.16076  | -6.18640 | 0.30925  |
| C | 2.02356  | -6.48660 | 0.40245  |
| H | 2.09557  | -7.57378 | 0.34614  |
| C | 0.77367  | -5.87468 | 0.50104  |
| H | -0.13298 | -6.48122 | 0.52385  |
| C | 0.67422  | -4.48616 | 0.57279  |
| H | -0.29945 | -3.98914 | 0.64812  |
| C | -3.78554 | -2.51541 | -1.04029 |
| C | -3.68200 | -1.61548 | 0.05204  |
| C | -4.87686 | -2.42712 | -1.91227 |
| H | -4.94436 | -3.10972 | -2.76211 |
| C | -5.87081 | -1.46558 | -1.75762 |
| C | -5.77466 | -0.60321 | -0.66342 |
| H | -6.55873 | 0.14322  | -0.52339 |
| C | -4.72035 | -0.66788 | 0.25195  |
| C | -2.93970 | -4.79434 | -0.40647 |
| H | -2.93043 | -4.51154 | 0.65678  |
| H | -2.15290 | -5.54672 | -0.57624 |
| H | -3.91233 | -5.26164 | -0.62707 |
| C | -2.59131 | -3.99340 | -2.76531 |

|    |          |          |          |
|----|----------|----------|----------|
| H  | -2.49530 | -3.12193 | -3.43076 |
| H  | -3.45399 | -4.58809 | -3.10328 |
| H  | -1.69581 | -4.62092 | -2.89141 |
| C  | -2.71973 | -3.57091 | -1.30262 |
| H  | -1.76158 | -3.11695 | -1.00301 |
| C  | -7.00817 | -1.33957 | -2.75278 |
| H  | -6.87200 | -2.13829 | -3.50042 |
| C  | -8.37333 | -1.54424 | -2.09065 |
| H  | -9.18030 | -1.50128 | -2.83750 |
| C  | -6.94927 | 0.00375  | -3.48686 |
| H  | -7.73869 | 0.07223  | -4.25052 |
| H  | -7.08959 | 0.83822  | -2.78189 |
| H  | -5.97537 | 0.14114  | -3.97898 |
| H  | -8.42367 | -2.51562 | -1.57895 |
| H  | -8.56752 | -0.75970 | -1.34308 |
| C  | -4.75257 | 0.24699  | 1.47237  |
| H  | -3.73262 | 0.62151  | 1.64320  |
| C  | -5.66536 | 1.46290  | 1.31453  |
| H  | -5.53155 | 2.15282  | 2.16149  |
| H  | -6.72787 | 1.17585  | 1.30483  |
| H  | -5.45948 | 2.01175  | 0.38245  |
| C  | -5.15497 | -0.54943 | 2.71990  |
| H  | -5.15867 | 0.09859  | 3.61118  |
| H  | -4.45407 | -1.37740 | 2.89420  |
| H  | -6.16647 | -0.96566 | 2.59383  |
| P  | -2.17446 | -1.77084 | 1.14437  |
| Si | 1.14018  | 0.01904  | 0.71553  |
| C  | 4.96131  | 1.32743  | 2.74778  |
| H  | 4.23633  | 2.14515  | 2.63530  |
| H  | 5.97444  | 1.73359  | 2.60206  |

|   |         |          |          |
|---|---------|----------|----------|
| C | 3.69288 | 1.56021  | -0.21829 |
| C | 3.87256 | 2.15864  | -1.49303 |
| C | 5.04401 | 1.91142  | -2.21873 |
| H | 5.16631 | 2.35612  | -3.20894 |
| C | 6.06837 | 1.11086  | -1.72221 |
| C | 5.90620 | 0.57001  | -0.44555 |
| H | 6.70933 | -0.04382 | -0.03423 |
| C | 4.75336 | 0.78104  | 0.31471  |
| C | 2.83648 | 3.11292  | -2.07192 |
| H | 1.85379 | 2.75907  | -1.73018 |
| C | 2.80609 | 3.17009  | -3.59822 |
| H | 1.92934 | 3.74600  | -3.93081 |
| H | 2.74275 | 2.16421  | -4.04007 |
| H | 3.69619 | 3.66865  | -4.01163 |
| C | 3.02913 | 4.51571  | -1.48222 |
| H | 2.97898 | 4.48948  | -0.38357 |
| H | 2.25099 | 5.20295  | -1.85105 |
| H | 4.01175 | 4.92106  | -1.77038 |
| C | 4.69175 | 0.21563  | 1.72660  |
| H | 3.66513 | -0.14314 | 1.88326  |
| H | 4.89375 | 0.94165  | 3.77754  |
| C | 5.62913 | -0.96398 | 1.97816  |
| H | 6.68747 | -0.66282 | 1.95131  |
| H | 5.48641 | -1.76494 | 1.23561  |
| H | 5.44454 | -1.38070 | 2.97978  |
| H | 7.20801 | 1.37836  | -3.48876 |
| C | 7.31533 | 0.83020  | -2.53824 |
| C | 8.57788 | 1.34419  | -1.84165 |
| H | 9.46526 | 1.18125  | -2.47164 |
| H | 8.49905 | 2.41833  | -1.62284 |

|                  |          |          |          |
|------------------|----------|----------|----------|
| H                | 8.74274  | 0.81808  | -0.88865 |
| C                | 7.43656  | -0.66029 | -2.86926 |
| H                | 6.53981  | -1.02133 | -3.39315 |
| H                | 8.31295  | -0.85232 | -3.50657 |
| H                | 7.55171  | -1.25553 | -1.94981 |
| <b>2_triplet</b> |          |          |          |
| Si               | 1.14907  | -0.12307 | 0.53546  |
| P                | -2.05743 | -1.90148 | 0.87170  |
| N                | 2.25932  | -1.47843 | -0.40076 |
| N                | 1.59487  | -1.57845 | 1.65373  |
| N                | -1.72510 | 1.41203  | -0.31841 |
| N                | -1.81503 | 1.59892  | 1.82604  |
| C                | 2.10858  | -2.28477 | 0.63738  |
| C                | 2.44159  | -1.78415 | -1.82867 |
| C                | 1.17197  | -2.42474 | -2.40042 |
| H                | 0.95026  | -3.38036 | -1.90092 |
| H                | 1.29684  | -2.61753 | -3.47678 |
| H                | 0.31156  | -1.75576 | -2.26181 |
| C                | 3.64905  | -2.69362 | -2.08082 |
| H                | 3.47151  | -3.72614 | -1.75651 |
| H                | 4.54017  | -2.29760 | -1.57065 |
| H                | 3.85860  | -2.71151 | -3.16060 |
| C                | 2.73464  | -2.80448 | 3.50481  |
| H                | 2.81585  | -2.79780 | 4.60131  |
| H                | 3.68347  | -2.42953 | 3.08915  |
| H                | 2.59325  | -3.84466 | 3.18650  |
| C                | 0.24498  | -2.56942 | 3.48777  |
| H                | 0.11342  | -3.51770 | 2.94797  |
| H                | -0.61859 | -1.93430 | 3.24733  |
| H                | 0.24279  | -2.78033 | 4.56794  |

|   |          |          |          |
|---|----------|----------|----------|
| C | 1.71877  | -0.57642 | 3.85417  |
| H | 1.60383  | -0.75093 | 4.93379  |
| H | 0.95593  | 0.14768  | 3.53881  |
| H | 2.70906  | -0.12878 | 3.67559  |
| C | 1.56421  | -1.89959 | 3.09613  |
| C | 2.71392  | -0.44540 | -2.52230 |
| H | 1.91212  | 0.27834  | -2.31380 |
| H | 2.77690  | -0.59425 | -3.61024 |
| H | 3.66106  | -0.01511 | -2.16539 |
| C | 2.27708  | -3.76487 | 0.65369  |
| C | 1.10562  | -4.53076 | 0.62321  |
| H | 0.13437  | -4.02317 | 0.58543  |
| C | 1.19347  | -5.92284 | 0.63276  |
| H | 0.28090  | -6.52012 | 0.60121  |
| C | 3.60543  | -5.77698 | 0.72643  |
| H | 4.58040  | -6.26384 | 0.77467  |
| C | 2.43993  | -6.54520 | 0.68903  |
| H | 2.50559  | -7.63416 | 0.70430  |
| C | -1.97812 | 2.25609  | 0.68920  |
| C | 3.52701  | -4.38721 | 0.70170  |
| H | 4.43338  | -3.78024 | 0.73020  |
| C | -1.40596 | 2.87098  | -2.31996 |
| H | -1.97869 | 3.75811  | -2.01875 |
| H | -1.41704 | 2.82233  | -3.41883 |
| H | -0.36354 | 2.99319  | -1.99278 |
| C | -1.99190 | 1.56812  | -1.76098 |
| C | -1.31832 | 0.39222  | -2.46618 |
| H | -0.22712 | 0.45391  | -2.35213 |
| H | -1.56415 | 0.41370  | -3.53777 |
| H | -1.66813 | -0.56194 | -2.04406 |

|   |          |         |          |
|---|----------|---------|----------|
| C | -3.50029 | 1.51083 | -2.02663 |
| H | -3.91410 | 0.54174 | -1.71492 |
| H | -3.69145 | 1.64391 | -3.10221 |
| H | -4.02602 | 2.31378 | -1.48860 |
| C | -1.87815 | 2.04150 | 3.22518  |
| C | -3.11105 | 2.91720 | 3.47688  |
| H | -4.01131 | 2.43923 | 3.06382  |
| H | -3.00579 | 3.91704 | 3.03653  |
| H | -3.25007 | 3.04081 | 4.56085  |
| C | -0.60840 | 2.80567 | 3.61442  |
| H | -0.64309 | 3.07299 | 4.68119  |
| H | -0.51344 | 3.73317 | 3.03185  |
| H | 0.28854  | 2.19660 | 3.43500  |
| C | -1.99749 | 0.77055 | 4.07192  |
| H | -2.03491 | 1.03444 | 5.13830  |
| H | -1.13531 | 0.10887 | 3.91077  |
| H | -2.90422 | 0.20476 | 3.81125  |
| C | -2.22803 | 3.71645 | 0.54239  |
| C | -3.51024 | 4.24968 | 0.39669  |
| H | -4.37950 | 3.59059 | 0.42554  |
| C | -3.67097 | 5.62433 | 0.23024  |
| H | -4.67214 | 6.04197 | 0.11558  |
| C | -2.55727 | 6.46407 | 0.21381  |
| H | -2.68791 | 7.53930 | 0.08364  |
| C | -1.27714 | 5.93069 | 0.36965  |
| H | -0.40500 | 6.58641 | 0.36379  |
| C | -1.10970 | 4.55772 | 0.53271  |
| H | -0.11065 | 4.12463 | 0.64377  |
| C | 3.58285  | 2.58852 | -1.05869 |
| C | 3.64145  | 1.74194 | 0.06787  |

|   |         |          |          |
|---|---------|----------|----------|
| C | 4.64660 | 2.58589  | -1.96780 |
| H | 4.60417 | 3.22649  | -2.85076 |
| C | 5.76167 | 1.76803  | -1.79739 |
| C | 5.80137 | 0.93593  | -0.67562 |
| H | 6.66299 | 0.28053  | -0.53637 |
| C | 4.76699 | 0.90675  | 0.26086  |
| C | 2.50438 | 4.76569  | -0.42120 |
| H | 2.59032 | 4.52196  | 0.64816  |
| H | 1.62625 | 5.41486  | -0.56322 |
| H | 3.39994 | 5.33557  | -0.71307 |
| C | 2.15401 | 3.87965  | -2.74341 |
| H | 2.09955 | 2.99002  | -3.38854 |
| H | 2.95455 | 4.53252  | -3.12224 |
| H | 1.21040 | 4.43596  | -2.84211 |
| C | 2.38447 | 3.50153  | -1.28162 |
| H | 1.49228 | 2.94003  | -0.94613 |
| C | 6.87138 | 1.73344  | -2.83024 |
| H | 6.66250 | 2.53602  | -3.55636 |
| C | 8.24532 | 2.00546  | -2.21350 |
| H | 9.01990 | 2.04213  | -2.99377 |
| C | 6.86013 | 0.40103  | -3.58727 |
| H | 7.63093 | 0.38692  | -4.37240 |
| H | 7.06062 | -0.43557 | -2.89947 |
| H | 5.88153 | 0.22234  | -4.05589 |
| H | 8.25473 | 2.96048  | -1.66962 |
| H | 8.52507 | 1.21052  | -1.50535 |
| C | 4.87576 | 0.00658  | 1.48524  |
| H | 3.86106 | -0.36216 | 1.70969  |
| C | 5.75669 | -1.22157 | 1.26605  |
| H | 5.67479 | -1.90726 | 2.12311  |

|    |          |          |          |
|----|----------|----------|----------|
| H  | 6.81968  | -0.95164 | 1.17466  |
| H  | 5.46173  | -1.76250 | 0.35464  |
| C  | 5.36439  | 0.79958  | 2.70408  |
| H  | 5.38912  | 0.15884  | 3.59950  |
| H  | 4.71070  | 1.65829  | 2.91438  |
| H  | 6.38166  | 1.18077  | 2.52551  |
| P  | 2.26828  | 1.72234  | 1.31403  |
| Si | -1.18960 | 0.05789  | 0.86096  |
| C  | -5.11328 | -1.46144 | 2.67550  |
| H  | -4.32224 | -2.22344 | 2.65783  |
| H  | -6.08017 | -1.95113 | 2.47967  |
| C  | -3.58297 | -1.69282 | -0.19406 |
| C  | -3.59881 | -2.32217 | -1.46656 |
| C  | -4.73086 | -2.21524 | -2.28335 |
| H  | -4.72792 | -2.68425 | -3.26990 |
| C  | -5.87103 | -1.52551 | -1.88167 |
| C  | -5.86309 | -0.94298 | -0.61315 |
| H  | -6.75448 | -0.40558 | -0.28337 |
| C  | -4.75361 | -1.01110 | 0.23454  |
| C  | -2.42045 | -3.15707 | -1.94904 |
| H  | -1.51686 | -2.69739 | -1.52222 |
| C  | -2.25691 | -3.20614 | -3.46721 |
| H  | -1.30189 | -3.68968 | -3.72305 |
| H  | -2.25922 | -2.19713 | -3.90708 |
| H  | -3.05443 | -3.79021 | -3.95217 |
| C  | -2.50438 | -4.57401 | -1.36891 |
| H  | -2.54973 | -4.54217 | -0.27024 |
| H  | -1.62442 | -5.16842 | -1.66450 |
| H  | -3.40694 | -5.08797 | -1.73567 |
| C  | -4.84684 | -0.38263 | 1.61938  |

|                  |          |          |          |
|------------------|----------|----------|----------|
| H                | -3.86445 | 0.06195  | 1.83814  |
| H                | -5.15166 | -1.02082 | 3.68479  |
| C                | -5.88743 | 0.73076  | 1.73198  |
| H                | -6.91451 | 0.34459  | 1.64795  |
| H                | -5.75048 | 1.49724  | 0.95267  |
| H                | -5.81288 | 1.21617  | 2.71673  |
| H                | -6.84588 | -1.96658 | -3.71058 |
| C                | -7.07086 | -1.38823 | -2.79933 |
| C                | -8.34060 | -1.97218 | -2.17480 |
| H                | -9.18527 | -1.91190 | -2.87756 |
| H                | -8.19513 | -3.02481 | -1.89442 |
| H                | -8.62129 | -1.41727 | -1.26646 |
| C                | -7.28227 | 0.07196  | -3.21147 |
| H                | -6.37711 | 0.48284  | -3.68125 |
| H                | -8.11772 | 0.16572  | -3.92185 |
| H                | -7.51488 | 0.69270  | -2.33196 |
| <b>3_singlet</b> |          |          |          |
| K                | -5.92917 | 1.51553  | 0.59345  |
| C                | -4.71464 | 4.52351  | -1.09802 |
| H                | -4.45578 | 5.59826  | -1.10540 |
| H                | -5.18443 | 4.27840  | -2.06950 |
| O                | -5.61215 | 4.24421  | -0.04633 |
| C                | -6.80125 | 4.98165  | -0.13415 |
| H                | -7.36705 | 4.70059  | -1.04303 |
| C                | -7.63936 | 4.71056  | 1.08800  |
| H                | -7.07105 | 4.98126  | 1.99748  |
| O                | -7.98712 | 3.34771  | 1.11675  |
| C                | -8.88087 | 3.03211  | 2.15377  |
| H                | -9.81154 | 3.62157  | 2.05668  |
| H                | -8.42925 | 3.26389  | 3.13668  |

|   |          |          |          |
|---|----------|----------|----------|
| C | -9.21392 | 1.56433  | 2.08917  |
| O | -8.04545 | 0.82184  | 2.32344  |
| H | -3.06156 | -2.05042 | 0.71661  |
| H | -4.57136 | -1.99988 | -0.23580 |
| O | -6.43193 | 0.17560  | -1.62978 |
| C | -6.84909 | -1.16242 | -1.82800 |
| H | -7.89457 | -1.18281 | -2.19191 |
| H | -6.80023 | -1.67404 | -0.85657 |
| C | -5.89407 | -1.71403 | -2.88758 |
| H | -6.34653 | -2.52386 | -3.47384 |
| H | -4.98550 | -2.11291 | -2.41308 |
| C | -5.55651 | -0.47119 | -3.73804 |
| H | -4.47455 | -0.39120 | -3.90969 |
| H | -6.04302 | -0.50576 | -4.72143 |
| C | -6.09143 | 0.70960  | -2.90129 |
| H | -5.34871 | 1.50178  | -2.73259 |
| H | -6.99060 | 1.14969  | -3.36910 |
| O | -3.84028 | -0.16036 | 0.36680  |
| C | -3.14586 | 0.06348  | -0.84398 |
| H | -3.81259 | -0.16061 | -1.69811 |
| H | -2.26872 | -0.59793 | -0.90397 |
| C | -2.67810 | 1.48879  | -0.90599 |
| H | -2.04069 | 1.71261  | -0.03255 |
| H | -2.05067 | 1.63023  | -1.80327 |
| O | -3.81133 | 2.34749  | -0.93644 |
| C | -3.46415 | 3.70435  | -0.91256 |
| H | -2.74962 | 3.94416  | -1.72100 |
| H | -2.98085 | 3.96514  | 0.04786  |
| H | -6.58693 | 6.06530  | -0.18874 |
| H | -8.54781 | 5.33992  | 1.05198  |

|    |          |          |          |
|----|----------|----------|----------|
| H  | -9.98030 | 1.33591  | 2.85298  |
| H  | -9.63684 | 1.32029  | 1.09602  |
| C  | -8.27962 | -0.56142 | 2.43824  |
| H  | -8.69405 | -0.96059 | 1.49313  |
| H  | -9.00887 | -0.76177 | 3.24479  |
| C  | -6.97819 | -1.25268 | 2.75291  |
| H  | -6.54568 | -0.82214 | 3.67623  |
| H  | -7.17017 | -2.32621 | 2.93788  |
| O  | -6.10672 | -1.08009 | 1.67042  |
| C  | -4.84208 | -1.68224 | 1.86669  |
| H  | -4.96251 | -2.75446 | 2.10516  |
| H  | -4.31921 | -1.19519 | 2.71077  |
| C  | -4.03154 | -1.53014 | 0.60934  |
| P  | 3.33279  | 1.22177  | -2.16722 |
| P  | 0.34771  | -0.13417 | -0.94152 |
| Si | 2.49554  | -0.06449 | -0.66659 |
| N  | 3.28507  | 0.09128  | 1.06116  |
| N  | 3.31393  | -1.71565 | -0.11077 |
| C  | 3.76033  | -1.14818 | 1.00534  |
| C  | 4.74088  | -1.74341 | 1.95674  |
| C  | 4.39227  | -2.73953 | 2.87124  |
| H  | 3.35352  | -3.06012 | 2.95101  |
| C  | 5.37142  | -3.31074 | 3.68314  |
| H  | 5.09531  | -4.08765 | 4.39758  |
| C  | 6.69866  | -2.89569 | 3.57832  |
| H  | 7.46429  | -3.35176 | 4.20797  |
| C  | 7.04502  | -1.89136 | 2.67380  |
| H  | 8.08080  | -1.55753 | 2.59215  |
| C  | 6.06796  | -1.30951 | 1.86961  |
| H  | 6.32114  | -0.51517 | 1.16238  |

|   |         |          |          |
|---|---------|----------|----------|
| C | 3.57279 | -3.03225 | -0.70996 |
| C | 3.21343 | -2.89539 | -2.19273 |
| H | 2.16129 | -2.58918 | -2.29242 |
| H | 3.35241 | -3.85904 | -2.70443 |
| H | 3.83187 | -2.12718 | -2.68141 |
| C | 2.66922 | -4.09527 | -0.07197 |
| H | 1.60839 | -3.83897 | -0.19791 |
| H | 2.88821 | -4.19462 | 1.00223  |
| H | 2.85353 | -5.07199 | -0.54551 |
| C | 3.33524 | 1.09963  | 2.12741  |
| C | 5.03656 | -3.47586 | -0.57863 |
| H | 5.20571 | -4.33882 | -1.23962 |
| H | 5.28986 | -3.78454 | 0.44479  |
| H | 5.72066 | -2.67294 | -0.87914 |
| C | 4.75743 | 1.63332  | 2.35083  |
| H | 5.24653 | 1.83593  | 1.38753  |
| H | 5.36981 | 0.92533  | 2.92647  |
| H | 4.71229 | 2.57474  | 2.92063  |
| C | 2.77927 | 0.53083  | 3.43838  |
| H | 2.81566 | 1.30528  | 4.21944  |
| H | 3.36998 | -0.32877 | 3.78736  |
| H | 1.73300 | 0.21817  | 3.30700  |
| C | 2.43095 | 2.24289  | 1.66188  |
| H | 2.83470 | 2.68781  | 0.74260  |
| H | 2.37201 | 3.01722  | 2.44124  |
| H | 1.42040 | 1.86468  | 1.44131  |
| C | 4.89203 | 1.90276  | -1.36708 |
| C | 4.91360 | 3.25227  | -0.92472 |
| C | 6.05504 | 3.77757  | -0.30169 |
| H | 6.03649 | 4.81060  | 0.04803  |

|   |         |          |          |
|---|---------|----------|----------|
| C | 7.20158 | 3.01472  | -0.10224 |
| C | 7.21063 | 1.71726  | -0.62130 |
| H | 8.13030 | 1.13484  | -0.52107 |
| C | 6.10547 | 1.16225  | -1.27322 |
| C | 3.73423 | 4.18155  | -1.18451 |
| H | 2.82576 | 3.56264  | -1.13413 |
| C | 3.81498 | 4.71952  | -2.61827 |
| H | 2.95836 | 5.37614  | -2.83934 |
| H | 3.80754 | 3.88886  | -3.33828 |
| H | 4.74152 | 5.29877  | -2.76010 |
| C | 3.60160 | 5.33200  | -0.18707 |
| H | 4.39532 | 6.08497  | -0.31562 |
| H | 3.63883 | 4.97445  | 0.85330  |
| H | 2.64138 | 5.84833  | -0.33809 |
| C | 8.40069 | 3.51189  | 0.68479  |
| H | 9.29775 | 3.07515  | 0.21297  |
| C | 8.33337 | 2.98805  | 2.12531  |
| H | 7.44226 | 3.39246  | 2.63065  |
| H | 9.22385 | 3.28410  | 2.70191  |
| H | 8.25479 | 1.89084  | 2.14341  |
| C | 8.56089 | 5.03043  | 0.67533  |
| H | 8.55748 | 5.42794  | -0.34969 |
| H | 9.50586 | 5.32000  | 1.15836  |
| H | 7.74579 | 5.51889  | 1.23101  |
| C | 6.25527 | -0.18580 | -1.97220 |
| H | 5.35325 | -0.77176 | -1.73196 |
| C | 6.28427 | 0.01751  | -3.49425 |
| H | 5.38055 | 0.53525  | -3.83903 |
| H | 6.34533 | -0.95384 | -4.01067 |
| H | 7.16827 | 0.61260  | -3.77441 |

|   |          |          |          |
|---|----------|----------|----------|
| C | 7.49582  | -0.98548 | -1.57170 |
| H | 7.48545  | -1.96247 | -2.07739 |
| H | 7.56187  | -1.16992 | -0.48933 |
| H | 8.41758  | -0.47132 | -1.88472 |
| C | -0.19494 | -1.89095 | -0.59160 |
| C | -0.35666 | -2.41429 | 0.72016  |
| C | -0.97796 | -3.65088 | 0.91919  |
| H | -1.09537 | -4.03841 | 1.93580  |
| C | -1.46118 | -4.42182 | -0.14019 |
| C | -1.27048 | -3.92901 | -1.42964 |
| H | -1.60591 | -4.52512 | -2.28090 |
| C | -0.64096 | -2.70030 | -1.67530 |
| C | 0.10693  | -1.63498 | 1.93981  |
| H | 0.93062  | -0.98651 | 1.60639  |
| C | -1.01656 | -0.72091 | 2.43947  |
| H | -1.38967 | -0.08703 | 1.62153  |
| H | -0.66820 | -0.06764 | 3.25621  |
| H | -1.85180 | -1.33016 | 2.82738  |
| C | 0.61647  | -2.52973 | 3.07071  |
| H | -0.20615 | -3.03493 | 3.60155  |
| H | 1.16672  | -1.93592 | 3.81633  |
| H | 1.28432  | -3.31156 | 2.67894  |
| C | -2.20132 | -5.71797 | 0.13656  |
| H | -1.82338 | -6.10253 | 1.09887  |
| C | -3.70084 | -5.44350 | 0.30457  |
| H | -4.11520 | -5.03015 | -0.62925 |
| H | -3.87406 | -4.70947 | 1.10604  |
| H | -4.25496 | -6.36273 | 0.55061  |
| C | -1.96768 | -6.79651 | -0.92082 |
| H | -2.42226 | -7.74829 | -0.60786 |

|   |          |                  |          |
|---|----------|------------------|----------|
| H | -0.89425 | -6.96193         | -1.08936 |
| H | -2.42193 | -6.51716         | -1.88364 |
| C | -0.45226 | -2.26868         | -3.12574 |
| H | 0.40538  | -1.57839         | -3.13224 |
| C | -0.15171 | -3.43314         | -4.07212 |
| H | 0.18510  | -3.04513         | -5.04487 |
| H | -1.03962 | -4.05736         | -4.26224 |
| H | 0.63971  | -4.08293         | -3.67041 |
| C | -1.65400 | -1.46641         | -3.63677 |
| H | -1.73720 | -0.51604         | -3.08977 |
| H | -2.58837 | -2.04179         | -3.51317 |
| H | -1.53557 | -1.23004         | -4.70591 |
|   |          | <b>3_triplet</b> |          |
| K | -5.73870 | -1.68274         | -0.50166 |
| C | -4.21818 | -4.52600         | 1.21720  |
| H | -3.86703 | -5.57404         | 1.23929  |
| H | -4.67092 | -4.29581         | 2.20033  |
| O | -5.17559 | -4.35299         | 0.19597  |
| C | -6.30142 | -5.17224         | 0.36235  |
| H | -6.84697 | -4.89951         | 1.28601  |
| C | -7.21074 | -5.01127         | -0.82778 |
| H | -6.66198 | -5.26818         | -1.75319 |
| O | -7.66864 | -3.68229         | -0.88395 |
| C | -8.61386 | -3.47145         | -1.90207 |
| H | -9.48593 | -4.13755         | -1.76494 |
| H | -8.16977 | -3.68799         | -2.89187 |
| C | -9.07242 | -2.03714         | -1.86102 |
| O | -7.97858 | -1.20296         | -2.14280 |
| H | -3.19518 | 2.11773          | -0.79401 |
| H | -4.66323 | 1.97581          | 0.21312  |



|   |          |          |          |
|---|----------|----------|----------|
| O | -6.28899 | -0.39866 | 1.74437  |
| C | -6.85787 | 0.89109  | 1.87205  |
| H | -7.89374 | 0.81063  | 2.25464  |
| H | -6.88093 | 1.34569  | 0.87140  |
| C | -5.96222 | 1.61474  | 2.87897  |
| H | -6.50328 | 2.39354  | 3.43128  |
| H | -5.11839 | 2.09720  | 2.36444  |
| C | -5.45780 | 0.47329  | 3.78736  |
| H | -4.36994 | 0.53116  | 3.92750  |
| H | -5.91912 | 0.50918  | 4.78274  |
| C | -5.86891 | -0.81060 | 3.03667  |
| H | -5.04613 | -1.52553 | 2.89824  |
| H | -6.70443 | -1.31772 | 3.55204  |
| O | -3.80169 | 0.18225  | -0.35754 |
| C | -3.07522 | 0.04833  | 0.84695  |
| H | -3.75116 | 0.22062  | 1.70570  |
| H | -2.26435 | 0.79073  | 0.88535  |
| C | -2.47293 | -1.32533 | 0.92473  |
| H | -1.82509 | -1.50053 | 0.04715  |
| H | -1.82674 | -1.39215 | 1.81738  |
| O | -3.51929 | -2.28479 | 0.98035  |
| C | -3.05260 | -3.60540 | 0.96576  |
| H | -2.28976 | -3.76442 | 1.74970  |
| H | -2.58487 | -3.84272 | -0.00848 |
| H | -6.00399 | -6.23440 | 0.44423  |
| H | -8.06273 | -5.70913 | -0.73005 |
| H | -9.87345 | -1.89385 | -2.60970 |
| H | -9.49086 | -1.80662 | -0.86283 |
| C | -8.33117 | 0.15301  | -2.27530 |
| H | -8.74155 | 0.53878  | -1.32274 |

|    |          |          |          |
|----|----------|----------|----------|
| H  | -9.10413 | 0.27555  | -3.05637 |
| C  | -7.10388 | 0.93994  | -2.65671 |
| H  | -6.67800 | 0.52877  | -3.59175 |
| H  | -7.38846 | 1.99147  | -2.84860 |
| O  | -6.17495 | 0.85702  | -1.61135 |
| C  | -4.97593 | 1.56390  | -1.86777 |
| H  | -5.19971 | 2.61366  | -2.12953 |
| H  | -4.43911 | 1.10066  | -2.71636 |
| C  | -4.11430 | 1.52307  | -0.63543 |
| P  | 2.96726  | -1.19299 | 1.81219  |
| P  | 0.41080  | 0.56342  | 0.97919  |
| Si | 2.44643  | 0.39570  | 0.25011  |
| N  | 3.00477  | 0.13939  | -1.43201 |
| N  | 3.50446  | 1.78790  | -0.10124 |
| C  | 3.71978  | 1.35956  | -1.44146 |
| C  | 5.09349  | 1.44309  | -2.03490 |
| C  | 5.35167  | 2.09760  | -3.24078 |
| H  | 4.52072  | 2.57787  | -3.76442 |
| C  | 6.64885  | 2.14856  | -3.75879 |
| H  | 6.83809  | 2.66422  | -4.70217 |
| C  | 7.70118  | 1.54980  | -3.06909 |
| H  | 8.71487  | 1.59337  | -3.47158 |
| C  | 7.45284  | 0.89573  | -1.85791 |
| H  | 8.27065  | 0.41835  | -1.31172 |
| C  | 6.15993  | 0.84474  | -1.34872 |
| H  | 5.94735  | 0.32139  | -0.41375 |
| C  | 3.65119  | 3.16084  | 0.37553  |
| C  | 3.11883  | 3.21889  | 1.80980  |
| H  | 2.04363  | 2.98915  | 1.83083  |
| H  | 3.27354  | 4.22379  | 2.23058  |

|   |         |          |          |
|---|---------|----------|----------|
| H | 3.63773 | 2.48775  | 2.45052  |
| C | 2.85056 | 4.13292  | -0.50072 |
| H | 1.78370 | 3.86344  | -0.49342 |
| H | 3.21641 | 4.09542  | -1.53832 |
| H | 2.95477 | 5.16440  | -0.12953 |
| C | 2.94480 | -0.88159 | -2.46465 |
| C | 5.12680 | 3.58672  | 0.37189  |
| H | 5.23286 | 4.58694  | 0.82027  |
| H | 5.53189 | 3.62535  | -0.64893 |
| H | 5.73192 | 2.87508  | 0.95040  |
| C | 4.27687 | -1.63676 | -2.62221 |
| H | 4.63908 | -1.97781 | -1.64026 |
| H | 5.05097 | -0.99905 | -3.07166 |
| H | 4.13929 | -2.51321 | -3.27669 |
| C | 2.55525 | -0.26426 | -3.81308 |
| H | 2.56514 | -1.03287 | -4.60124 |
| H | 3.25787 | 0.53197  | -4.09718 |
| H | 1.54452 | 0.16293  | -3.75323 |
| C | 1.85328 | -1.87102 | -2.04799 |
| H | 2.12999 | -2.36852 | -1.10759 |
| H | 1.71496 | -2.64078 | -2.82261 |
| H | 0.90120 | -1.34371 | -1.87875 |
| C | 4.65956 | -1.82793 | 1.37015  |
| C | 4.76506 | -3.11659 | 0.78947  |
| C | 6.01650 | -3.60278 | 0.40440  |
| H | 6.08306 | -4.58179 | -0.07650 |
| C | 7.18415 | -2.86550 | 0.59976  |
| C | 7.07748 | -1.63440 | 1.24526  |
| H | 7.99261 | -1.06723 | 1.42628  |
| C | 5.84551 | -1.10410 | 1.64376  |

|   |         |          |          |
|---|---------|----------|----------|
| C | 3.54401 | -4.01558 | 0.64004  |
| H | 2.66518 | -3.36425 | 0.52348  |
| C | 3.33422 | -4.81096 | 1.93380  |
| H | 2.43439 | -5.44253 | 1.86618  |
| H | 3.21757 | -4.13012 | 2.78949  |
| H | 4.20074 | -5.46273 | 2.12688  |
| C | 3.59156 | -4.94153 | -0.57482 |
| H | 4.34116 | -5.73837 | -0.45226 |
| H | 3.82975 | -4.38436 | -1.49284 |
| H | 2.61620 | -5.43246 | -0.71206 |
| C | 8.52345 | -3.36861 | 0.09681  |
| H | 9.28650 | -2.65127 | 0.44212  |
| C | 8.55190 | -3.38490 | -1.43533 |
| H | 7.81019 | -4.09897 | -1.82626 |
| H | 9.54279 | -3.68522 | -1.80937 |
| H | 8.30612 | -2.39462 | -1.84511 |
| C | 8.88002 | -4.74272 | 0.66822  |
| H | 8.86637 | -4.73106 | 1.76722  |
| H | 9.88101 | -5.05665 | 0.33533  |
| H | 8.16273 | -5.50630 | 0.33004  |
| C | 5.79045 | 0.22754  | 2.38285  |
| H | 4.98403 | 0.81214  | 1.90637  |
| C | 5.43220 | 0.01645  | 3.86074  |
| H | 4.49453 | -0.54310 | 3.97988  |
| H | 5.31771 | 0.98574  | 4.37028  |
| H | 6.23489 | -0.54472 | 4.36478  |
| C | 7.07561 | 1.04917  | 2.29302  |
| H | 6.92163 | 2.03089  | 2.76473  |
| H | 7.38867 | 1.21962  | 1.25205  |
| H | 7.90311 | 0.55610  | 2.82688  |

|   |          |         |          |
|---|----------|---------|----------|
| C | -0.28950 | 2.22304 | 0.48759  |
| C | -0.49512 | 2.67235 | -0.84537 |
| C | -1.21016 | 3.84957 | -1.08567 |
| H | -1.35889 | 4.18121 | -2.11738 |
| C | -1.74941 | 4.62580 | -0.05879 |
| C | -1.51354 | 4.20695 | 1.24867  |
| H | -1.88821 | 4.81176 | 2.07665  |
| C | -0.78636 | 3.04542 | 1.54032  |
| C | -0.00194 | 1.88352 | -2.04858 |
| H | 0.83506  | 1.25382 | -1.71741 |
| C | -1.11495 | 0.95305 | -2.54523 |
| H | -1.50121 | 0.32657 | -1.72548 |
| H | -0.75373 | 0.29040 | -3.34828 |
| H | -1.95184 | 1.54888 | -2.95115 |
| C | 0.51758  | 2.77007 | -3.18283 |
| H | -0.29207 | 3.32504 | -3.68330 |
| H | 1.01124  | 2.15702 | -3.94976 |
| H | 1.25523  | 3.49301 | -2.80716 |
| C | -2.58643 | 5.84830 | -0.39006 |
| H | -2.20838 | 6.24319 | -1.34800 |

|   |          |         |          |
|---|----------|---------|----------|
| C | -4.05100 | 5.44564 | -0.60214 |
| H | -4.46169 | 5.01456 | 0.32544  |
| H | -4.13516 | 4.68792 | -1.39567 |
| H | -4.67005 | 6.31190 | -0.88333 |
| C | -2.48119 | 6.96435 | 0.64809  |
| H | -2.99797 | 7.86914 | 0.29556  |
| H | -1.43177 | 7.21929 | 0.85204  |
| H | -2.94882 | 6.66978 | 1.60007  |
| C | -0.54998 | 2.70266 | 3.00848  |
| H | 0.35858  | 2.08190 | 3.04039  |
| C | -0.31740 | 3.93145 | 3.88976  |
| H | 0.04621  | 3.61665 | 4.87922  |
| H | -1.24010 | 4.51046 | 4.05397  |
| H | 0.43182  | 4.60345 | 3.44636  |
| C | -1.68673 | 1.84449 | 3.57478  |
| H | -1.72017 | 0.86856 | 3.06806  |
| H | -2.65794 | 2.35254 | 3.44315  |
| H | -1.53811 | 1.65999 | 4.65037  |

### (S3) Crystal data of **2** and **3**

Suitable crystals for single crystal X-ray diffraction analysis of compounds **2** and **3** were selected under argon atmosphere and transferred in perfluorated oil on a microscope slide.<sup>17</sup> An appropriate crystal was selected using a polarizer microscope, mounted to the tip of a MiTeGen<sup>®</sup>MicroMount, fixed to a goniometer head and shock cooled by the crystal cooling device.

The data of **2** and **3** were collected from shock-cooled crystals at 100(2) K on a BRUKER D8 three circle diffractometer equipped with either an INCOATEC Mo or Ag Microsource with mirror optics (MoK $\alpha$   $\lambda$  = 0.71073 Å; AgK $\alpha$   $\lambda$  = 0.56086 Å) and SMART APEX II detector.

The diffraction data of **2** and **3** was integrated with SAINT<sup>18</sup> and an empirical absorption correction (SADABS)<sup>19</sup> was applied. The structures were solved by direct methods (SHELXT)<sup>20</sup> and refined by full-matrix least-squares methods against  $F^2$  (SHELXL).<sup>21</sup> All non-hydrogen-atoms were refined with anisotropic displacement parameters. The hydrogen atoms were refined isotropically on calculated positions using a riding model with their  $U_{\text{iso}}$  values constrained to equal to 1.5 times the  $U_{\text{eq}}$  of their pivot atoms for terminal sp<sup>3</sup> carbon atoms and 1.2 times for all other carbon atoms. Disordered moieties were refined using distance restraints and restraints for the anisotropic displacement parameters. Crystallographic data for the structures reported in this paper have been deposited with the Cambridge Crystallographic Data Centre (CCDC(**2**): 1507708; CCDC(**3**): 1507709). Crystal data, experimental details for the X-ray measurements and copies of the data can be obtained free of charge from the Cambridge Crystallographic Data Centre *via* [www.ccdc.cam.ac.uk/ data\\_request/cif](http://www.ccdc.cam.ac.uk/data_request/cif).

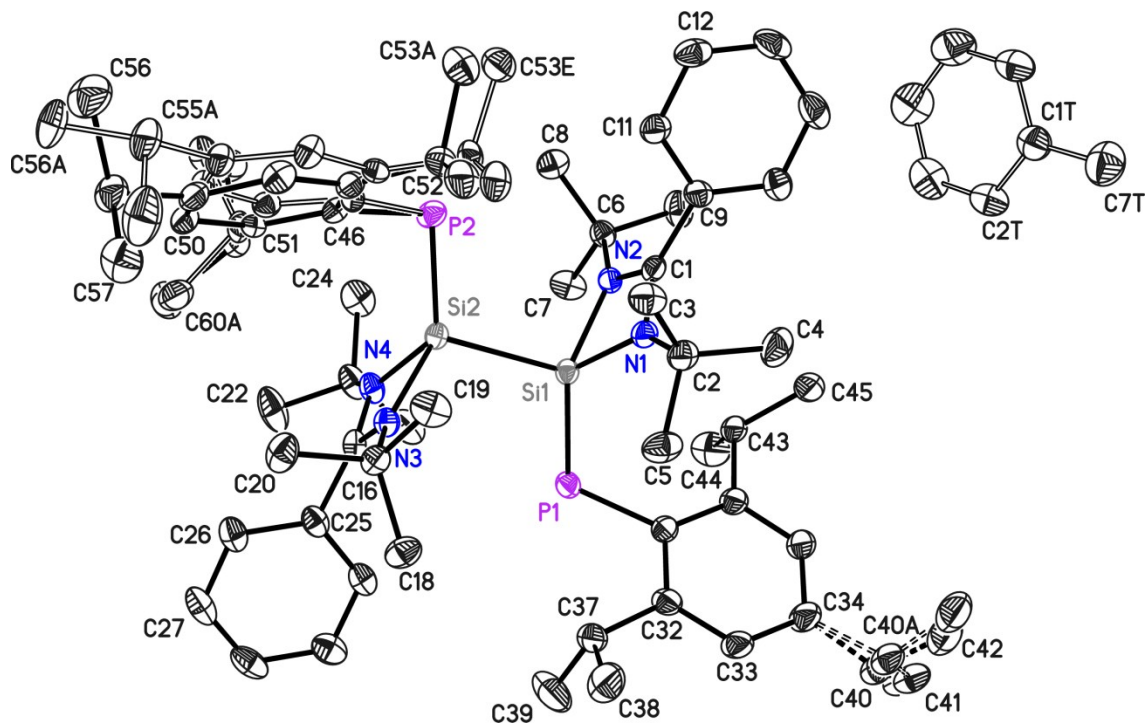

Figure S3: Molecular structure of **2**.

Table S11. Crystal data and structure refinement for **2**.

| Identification code    | Compound <b>2</b>                     |                             |
|------------------------|---------------------------------------|-----------------------------|
| Empirical formula      | $C_{63.50}H_{96}N_4P_2Si_2$           |                             |
| Formula weight         | 1033.56                               |                             |
| Temperature            | 100(2) K                              |                             |
| Wavelength             | 0.71073 Å                             |                             |
| Crystal system         | Triclinic                             |                             |
| Space group            | P-1                                   |                             |
| Unit cell dimensions   | $a = 12.044(5)$ Å                     | $\alpha = 81.95(2)^\circ$ . |
|                        | $b = 14.466(6)$ Å                     | $\beta = 77.12(2)^\circ$ .  |
|                        | $c = 19.396(8)$ Å                     | $\gamma = 69.98(2)^\circ$ . |
| Volume                 | $3088(2)$ Å <sup>3</sup>              |                             |
| Z                      | 2                                     |                             |
| Density (calculated)   | 1.112 Mg/m <sup>3</sup>               |                             |
| Absorption coefficient | 0.150 mm <sup>-1</sup>                |                             |
| F(000)                 | 1126                                  |                             |
| Crystal size           | 0.490 x 0.200 x 0.150 mm <sup>3</sup> |                             |

|                                   |                                             |
|-----------------------------------|---------------------------------------------|
| Theta range for data collection   | 1.788 to 25.433°.                           |
| Index ranges                      | -14<=h<=14, -17<=k<=17, -23<=l<=23          |
| Reflections collected             | 130813                                      |
| Independent reflections           | 11414 [R(int) = 0.0565]                     |
| Completeness to theta = 25.242°   | 100.0 %                                     |
| Absorption correction             | Semi-empirical from equivalents             |
| Max. and min. transmission        | 0.9705 and 0.9268                           |
| Refinement method                 | Full-matrix least-squares on F <sup>2</sup> |
| Data / restraints / parameters    | 11414 / 546 / 847                           |
| Goodness-of-fit on F <sup>2</sup> | 1.034                                       |
| Final R indices [I>2sigma(I)]     | R1 = 0.0382, wR2 = 0.0912                   |
| R indices (all data)              | R1 = 0.0580, wR2 = 0.1043                   |
| Extinction coefficient            | n/a                                         |
| Largest diff. peak and hole       | 0.299 and -0.244 e.Å <sup>-3</sup>          |

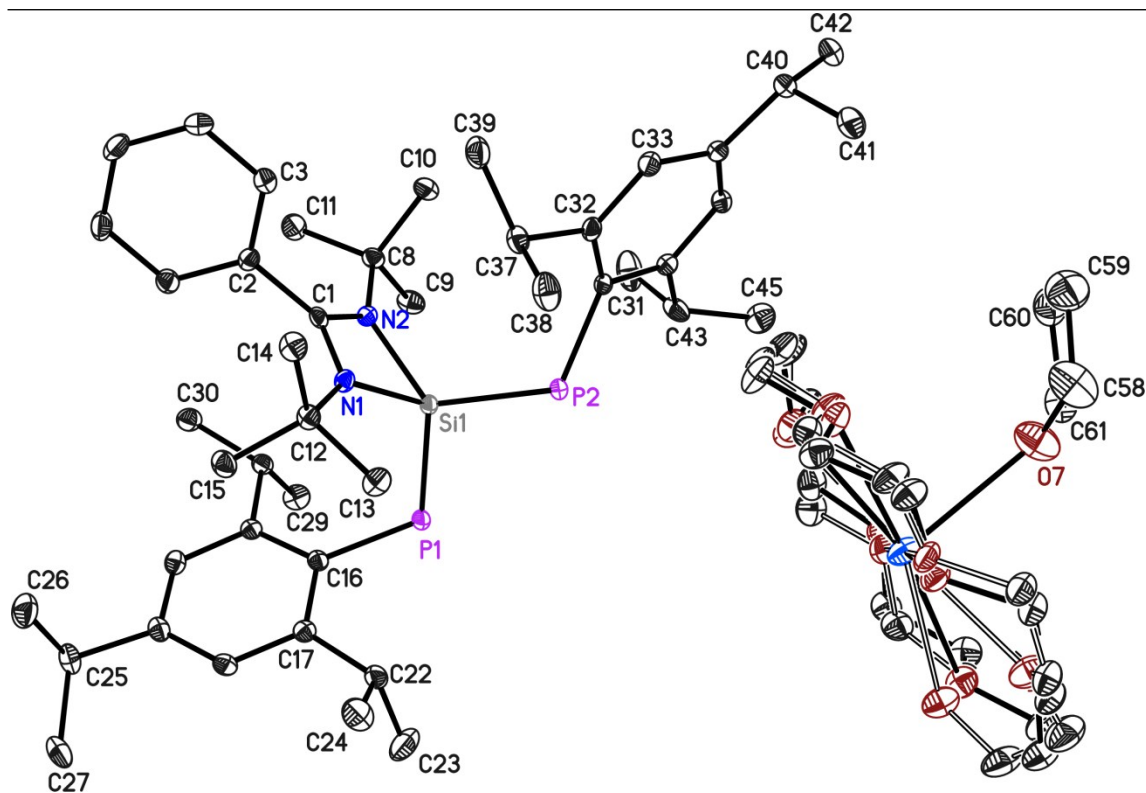

Figure S4: Molecular structure of compound 3.

Table S12. Crystal data and structure refinement for compound 4.

|                     |                                                                                   |
|---------------------|-----------------------------------------------------------------------------------|
| Identification code | compound 4                                                                        |
| Empirical formula   | C <sub>61</sub> H <sub>101</sub> KN <sub>2</sub> O <sub>7</sub> P <sub>2</sub> Si |

|                                   |                                             |                                |
|-----------------------------------|---------------------------------------------|--------------------------------|
| Formula weight                    | 1103.56                                     |                                |
| Temperature                       | 100(2) K                                    |                                |
| Wavelength                        | 0.56086 Å                                   |                                |
| Crystal system                    | Triclinic                                   |                                |
| Space group                       | P-1                                         |                                |
| Unit cell dimensions              | a = 10.771(3) Å                             | $\alpha = 101.050(10)^\circ$ . |
|                                   | b = 13.848(3) Å                             | $\beta = 103.860(10)^\circ$ .  |
|                                   | c = 22.433(5) Å                             | $\gamma = 100.660(10)^\circ$ . |
| Volume                            | 3093.4(13) Å <sup>3</sup>                   |                                |
| Z                                 | 2                                           |                                |
| Density (calculated)              | 1.185 Mg/m <sup>3</sup>                     |                                |
| Absorption coefficient            | 0.114 mm <sup>-1</sup>                      |                                |
| F(000)                            | 1200                                        |                                |
| Crystal size                      | 0.424 x 0.279 x 0.152 mm <sup>3</sup>       |                                |
| Theta range for data collection   | 1.523 to 20.289°.                           |                                |
| Index ranges                      | -13 ≤ h ≤ 13, -17 ≤ k ≤ 17, -27 ≤ l ≤ 27    |                                |
| Reflections collected             | 127873                                      |                                |
| Independent reflections           | 12250 [R(int) = 0.0419]                     |                                |
| Completeness to theta = 19.665°   | 100.0 %                                     |                                |
| Absorption correction             | Semi-empirical from equivalents             |                                |
| Max. and min. transmission        | 0.7445 and 0.7138                           |                                |
| Refinement method                 | Full-matrix least-squares on F <sup>2</sup> |                                |
| Data / restraints / parameters    | 12250 / 1901 / 848                          |                                |
| Goodness-of-fit on F <sup>2</sup> | 1.040                                       |                                |
| Final R indices [I > 2σ(I)]       | R1 = 0.0331, wR2 = 0.0764                   |                                |
| R indices (all data)              | R1 = 0.0416, wR2 = 0.0813                   |                                |
| Extinction coefficient            | n/a                                         |                                |
| Largest diff. peak and hole       | 0.471 and -0.247 e.Å <sup>-3</sup>          |                                |

---

(S4) NMR spectra

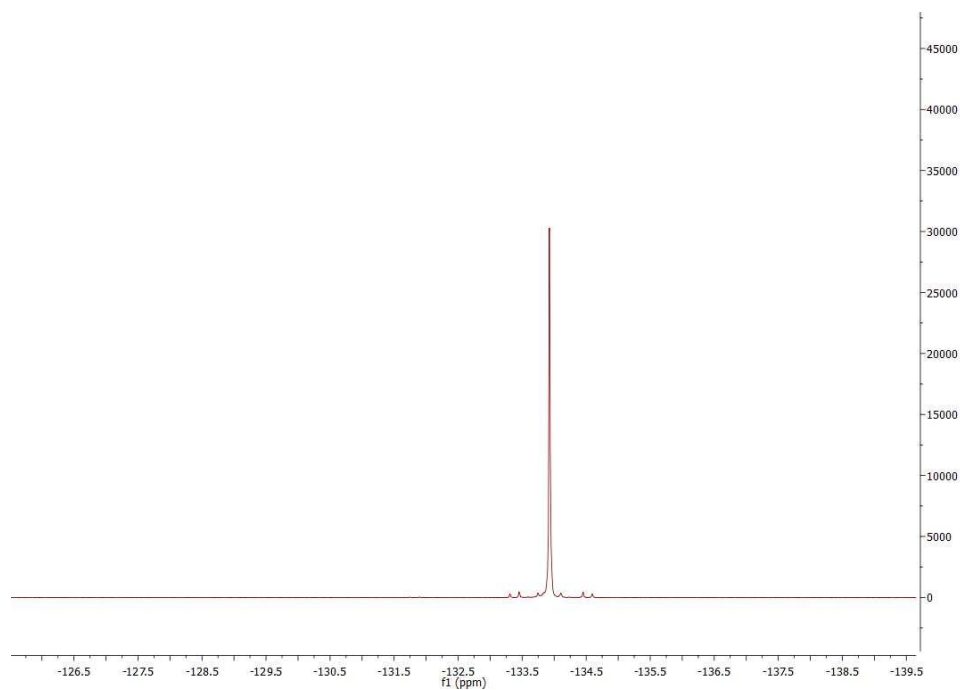

Figure S5:  $^{31}\text{P}$  NMR of complex **2**.

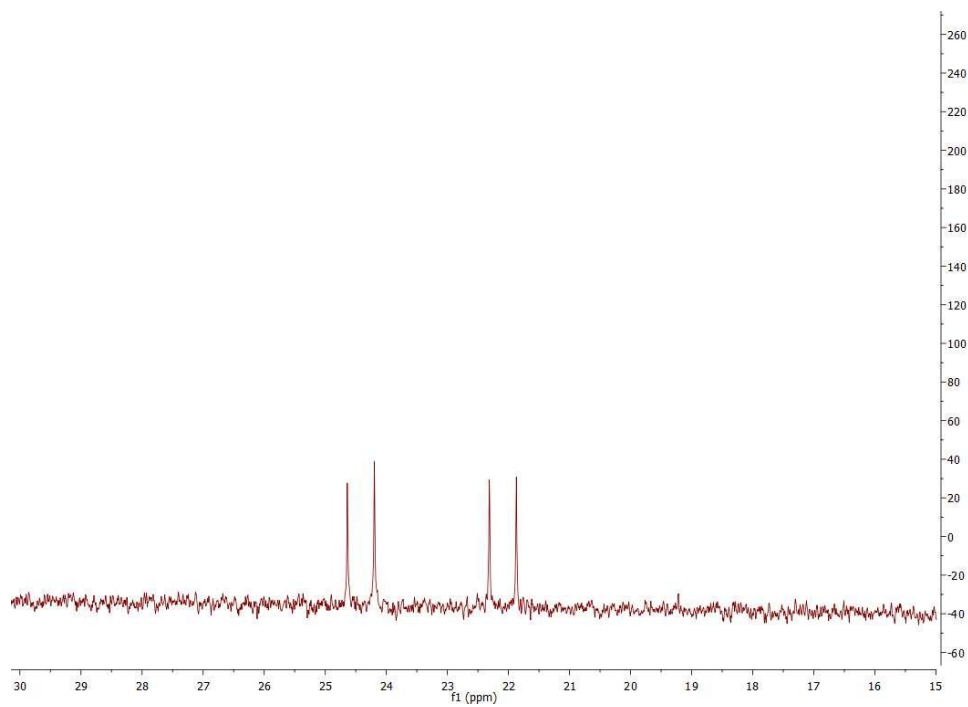

Figure S6:  $^{29}\text{Si}$  NMR of complex **2**.



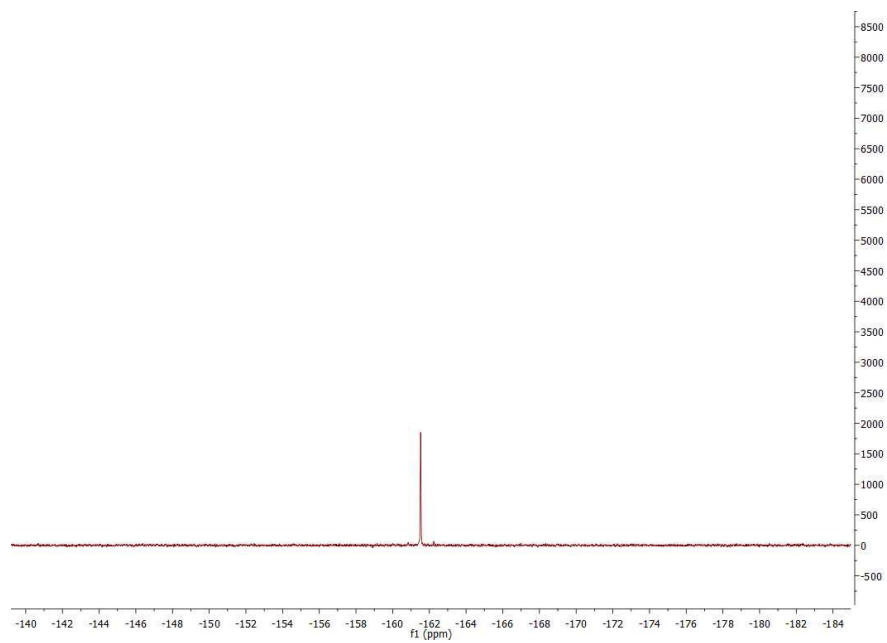

Figure S7:  $^{31}\text{P}$  NMR of complex **3**.

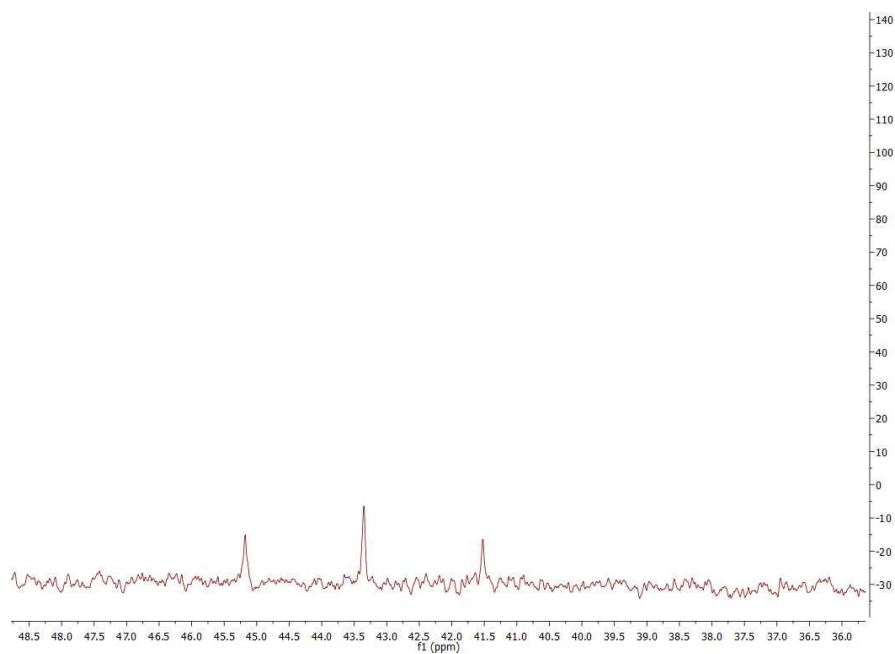

Figure S8:  $^{29}\text{Si}$  NMR of complex **3**.

## (S5) References

- (1) Gaussian 09, Revision D.01, M. J. Frisch, G. W. Trucks, H. B. Schlegel, G. E. Scuseria, M. A. Robb, J. R. Cheeseman, G. Scalmani, V. Barone, B. Mennucci, G. A. Petersson, H. Nakatsuji, M. Caricato, X. Li, H. P. Hratchian, A. F. Izmaylov, J. Bloino, G. Zheng, J. L. Sonnenberg, M. Hada, M. Ehara, K. Toyota, R. Fukuda, J. Hasegawa, M. Ishida, T. Nakajima, Y. Honda, O. Kitao, H. Nakai, T. Vreven, J. A. Montgomery, Jr., J. E. Peralta, F. Ogliaro, M. Bearpark, J. J. Heyd, E. Brothers, K. N. Kudin, V. N. Staroverov, T. Keith, R. Kobayashi, J. Normand, K. Raghavachari, A. Rendell, J. C. Burant, S. S. Iyengar, J. Tomasi, M. Cossi, N. Rega, J. M. Millam, M. Klene, J. E. Knox, J. B. Cross, V. Bakken, C. Adamo, J. Jaramillo, R. Gomperts, R. E. Stratmann, O. Yazyev, A. J. Austin, R. Cammi, C. Pomelli, J. W. Ochterski, R. L. Martin, K. Morokuma, V. G. Zakrzewski, G. A. Voth, P. Salvador, J. J. Dannenberg, S. Dapprich, A. D. Daniels, Ö. Farkas, J. B. Foresman, J. V. Ortiz, J. Cioslowski and D. J. Fox, Gaussian, Inc., Wallingford CT, 2013.
- (2) (a) G. teVelde, F. M. Bickelhaupt, E. J. Baerends, C. Fonseca Guerra, S. J. A. Van Gisbergen, J. G. Snijders and T. Ziegler, *J. Comput. Chem.*, 2001, **22**, 931. (b) C. Fonseca Guerra, J.G. Snijders, G. te Velde and E.J. Baerends, Towards an order-N DFT method, *Theoretical Chemistry Accounts* 1998, **99**, 391.
- (3) Y. Zhao, N. E. Schultz and D. G. Truhlar, *J. hem.Theory and Comput.*, 2006, **2**, 364.
- (4) A. Schäfer, H. Horn and R. J. Ahlrichs, *J. Chem. Phys.*, 1992, **97**, 2571.
- (5) A. V. Marenich, C. J. Cramer and D. G. Truhlar, *J. Phys. Chem. B*, 2009, **113**, 6378.
- (6) E. D. Glendening, J K. Badenhoop, A. E. Reed, J. E. Carpenter, J. A. Bohmann, C. M. Morales, C. R. Landis and F. Weinhold, Theoretical Chemistry Institute, University of Wisconsin, Madison (2013); <http://nbo6.chem.wisc.edu/>.
- (7) (a) A. D. Becke, *Phys. Rev. A*, 1988, **38**, 3098; (b) J. P. Perdew, *Phys. Rev. B*, 1986, **33**, 8822; (c) J. P. Perdew, *Phys. Rev. B*, 1986, **34**, 7406.
- (8) (a) E. Clementi and C. Roetti, *At. Data Nucl. Data Tables*, 1974, **14**, 177; (b) A. D. McLean and R. S. Mclean, *At. Data Nucl. Data Tables*, 1981, **26**, 197; (c) J. G. Snijders, P. Vernooijs and E. J. Baerends, *At.*

- Data Nucl. Data Tables*, 1981, **26**, 483; (d) D. P. Chong, E. V. Lenthe, S. V. Gisbergen and E. J. Baerends, *J. Comput. Chem.*, 2004, **25**, 1030.
- (9) E. V. Lenthe, E. J. Baerends and J. G. Snijders, *J. Chem. Phys.*, 1994, **101**, 9783.
- (10) AIMAll (Version 13.11.04, Standard), Copyright © 1997-2013, T. A. Keith, <http://aim.tkgristmill.com>
- (11) (a) J. P. Perdew, K. Burke, M. Ernzerhof, *Phys. Rev. Lett.*, 1996, **77**, 3865; (b) C. Adamo, V. Barone, *J. Chem. Phys.*, 1999, **110**, 6158; (c) M. Krykunov, T. Ziegler and E. van Lenthe, Hybrid density functional calculations of nuclear magnetic shieldings using Slater-type orbitals and the zeroth-order regular approximation, *Int. J. Quantum Chem.*, 2009, **109**, 1676.
- (12) M. Rezaei-Sameti, *J. Mol. Struct (Theochem)*, 2008, **867**, 122.
- (13) C. Y. Legault, CYLview, 1.0 b, Université de Sherbrooke, Quebec (Canada), 2009, <http://www.cylview.org> .
- (14) <http://www.chemcraftprog.com/index.html>.
- (15) S. S. Sen, H. W. Roesky, D. Stern, J. Henn and D. Stalke, *J. Am. Chem. Soc.*, 2010, **132**, 1123.
- (16) V. Chandrasekhar, P. Sasikumar, R. Boomishankar and G. Anantharaman, *Inorg. Chem.*, 2006, **45**, 3344.
- (17) (a) T. Kottke and D. Stalke, *J. Appl. Crystallogr.*, 1993, **26**, 615; b) T. Kottke, R. J. Lagow and D. Stalke, *J. Appl. Crystallogr.* 1996, **29**, 465; (c) D. Stalke, *Chem. Soc. Rev.*, 1998, **27**, 171.
- (18) SAINT v8.30C in BRUKER APEX II, BRUKER AXS Inst. Inc., Madison, USA, 2014.
- (19) L. Krause, R. Herbst-Irmer, G. M. Sheldrick, D. Stalke, *J. Appl. Crystallogr.* 2015, **48**, 3. (20) G. M. Sheldrick, *Acta Crystallogr. Sect. A*, 2015, **71**, 3.
- (21) G. M. Sheldrick, *Acta Crystallogr. Sect. C*, 2015, **71**, 3.
